# Supplementary material for: Investigation of the Possible Role of Tie2 Pathway and TEK Gene in Asthma and Allergic Conjunctivitis
Source: Front Genet. 2020 Feb 27;11:128. doi: 10.3389/fgene.2020.00128 (PMC7057532; doi:10.3389/fgene.2020.00128)
Supplement: Supplementary Table 2 — Results of the statistical evaluations of the comparisons of the allelic frequencies in the stage I study comparing patients with or without conjunctivitis. The results are presented in sheet ‘singlemarker’. The SNPs selected for the stage II study are in bold. The results of the statistical evaluation investigating 17 haplotypes are presented in sheet ‘haplotypeblocks’. [file Table_2.xls]

## Sheet: singlemarker
#	Name	Assoc Allele	Case,Control Frequencies	Chi square	P value
29	rs7034505	A	0.492, 0.330	7.966	0.0048
109	rs1590254	T	0.055, 0.000	5.999	0.0143
78	rs638203	G	0.667, 0.409	5.03	0.0249
50	rs3739542	C	0.342, 0.217	4.7	0.0302
47	rs994934	C	0.271, 0.160	4.285	0.0384
8	rs622232	A	0.444, 0.321	3.919	0.0477
34	rs4601425	C	0.616, 0.509	2.871	0.0902
21	rs7873161	C	0.450, 0.347	2.536	0.1113
45	rs671804	A	0.185, 0.113	2.415	0.1202
15	rs586441	C	0.151, 0.087	2.301	0.1293
20	rs6475966	T	0.432, 0.337	2.298	0.1295
30	rs7862217	G	0.753, 0.670	2.122	0.1452
42	rs2077317	G	0.148, 0.087	2.11	0.1463
23	rs10967731	A	0.308, 0.226	2.067	0.1505
1	rs3861015	G	0.884, 0.821	1.978	0.1596
32	rs10511804	A	0.740, 0.660	1.864	0.1721
33	rs7865623	C	0.986, 0.957	1.799	0.1799
7	rs12554723	T	0.718, 0.642	1.66	0.1975
25	rs17756667	A	0.829, 0.764	1.612	0.2042
106	rs7858722	C	0.562, 0.481	1.597	0.2063
49	rs10967756	T	0.979, 0.950	1.53	0.2161
96	rs1014049	T	0.445, 0.368	1.513	0.2186
13	rs7029731	C	1.000, 0.990	1.466	0.226
98	rs10812541	G	0.097, 0.058	1.273	0.2593
46	rs10967750	T	0.671, 0.604	1.217	0.2699
18	rs4242698	A	0.651, 0.585	1.131	0.2875
40	rs10511803	A	0.836, 0.783	1.11	0.29
5	rs677534	T	0.192, 0.142	1.097	0.295
95	rs7024846	T	0.500, 0.434	1.075	0.2999
59	rs682632	A	0.043, 0.020	0.998	0.3178
3	rs681182	A	0.199, 0.151	0.952	0.3292
73	rs7027984.1	A	0.260, 0.208	0.941	0.332
111	rs4409485	T	0.219, 0.170	0.941	0.332
74	rs7027647	G	0.264, 0.212	0.902	0.3422
82	rs10757641	T	0.891, 0.849	0.815	0.3667
35	rs664461	T	0.527, 0.472	0.762	0.3827
113	rs10967798	C	0.007, 0.000	0.729	0.3932
81	rs10812534	A	0.747, 0.698	0.725	0.3944
28	rs7871282	T	0.008, 0.000	0.715	0.3977
4	rs680739	T	0.192, 0.151	0.711	0.3992
14	rs679026	G	0.203, 0.160	0.708	0.4001
54	rs12350649	T	0.144, 0.108	0.692	0.4054
107	rs4878368	A	0.211, 0.170	0.668	0.4137
100	rs857	A	0.201, 0.160	0.646	0.4216
41	rs716676	G	0.833, 0.792	0.628	0.428
56	rs654422	T	0.925, 0.896	0.623	0.4299
6	rs10738763	C	0.199, 0.160	0.602	0.4377
86	rs617333	A	0.111, 0.082	0.541	0.4621
58	rs10967760	G	0.295, 0.255	0.485	0.4862
85	rs534129	G	0.459, 0.415	0.478	0.4892
44	rs1107774	T	0.637, 0.594	0.474	0.4913
108	rs7035592	G	0.333, 0.292	0.472	0.492
31	rs7035021	G	0.692, 0.651	0.467	0.4946
67	rs3818282	C	0.342, 0.302	0.461	0.4973
61	rs489347	G	0.675, 0.630	0.46	0.4978
17	rs17761403	C	0.089, 0.066	0.445	0.5048
105	rs7855140	C	0.089, 0.066	0.445	0.5048
12	rs590310	T	0.712, 0.673	0.442	0.506
64	rs2152065	G	0.340, 0.302	0.411	0.5215
99	rs7037246	G	0.219, 0.189	0.349	0.5548
76	rs7039849	T	0.288, 0.255	0.335	0.5625
65	rs2152066	T	0.375, 0.340	0.332	0.5647
10	rs651728	C	0.712, 0.679	0.319	0.5721
38	rs7855848	T	0.712, 0.679	0.319	0.5721
16	rs603085	G	0.116, 0.094	0.314	0.5755
83	rs1111782	C	0.361, 0.327	0.312	0.5767
88	rs550190	T	0.196, 0.167	0.305	0.581
66	rs1334811	G	0.966, 0.952	0.303	0.5823
68	rs1334812	T	0.966, 0.953	0.269	0.6039
110	rs10967795	C	0.219, 0.192	0.266	0.6059
55	rs651345	A	0.750, 0.721	0.26	0.6102
43	rs506685	G	0.732, 0.702	0.257	0.6121
52	rs666478	C	0.466, 0.434	0.251	0.6167
70	rs633903	T	0.808, 0.783	0.242	0.623
87	rs681707	G	0.212, 0.189	0.213	0.6446
90	rs574033	T	0.212, 0.189	0.213	0.6446
19	rs7042267	T	0.472, 0.443	0.198	0.6567
57	rs669102	C	0.604, 0.577	0.186	0.6665
62	rs2038569	G	0.151, 0.132	0.174	0.6769
22	rs11789885	C	0.592, 0.566	0.162	0.6871
89	rs550982	T	0.208, 0.189	0.147	0.701
112	rs4615675	A	0.120, 0.106	0.116	0.7336
2	rs630023	G	0.169, 0.153	0.108	0.7425
92	rs12337434	T	0.253, 0.236	0.102	0.7491
79	rs641848	T	0.329, 0.311	0.086	0.7697
91	rs10121367	A	0.250, 0.234	0.078	0.7804
75	rs671353	G	0.486, 0.472	0.052	0.8188
51	rs3824410	T	0.199, 0.189	0.039	0.8438
60	rs1322051	C	0.966, 0.962	0.031	0.86
71	rs606342	T	0.473, 0.462	0.026	0.871
80	rs2273720	C	0.046, 0.042	0.026	0.8712
93	rs3736819	A	0.042, 0.038	0.025	0.8754
84	rs3737188	T	0.779, 0.771	0.024	0.8774
37	rs586284	C	0.753, 0.745	0.022	0.8829
39	rs514643	G	0.753, 0.745	0.022	0.8829
53	rs12552228	T	0.125, 0.123	0.003	0.9554
94	rs2273719	A	0.144, 0.142	0.003	0.9585
11	rs617986	C	0.380, 0.377	0.002	0.9626
97	rs10812540	A	0.096, 0.094	0.002	0.967
69	rs4879250	C	0.685, 0.683	0.001	0.9701
36	rs13285984	T	0.229, 0.227	0.001	0.9818
63	rs581724	G	0.611, 0.610	0	0.986
101	rs9987817	A	0.123, 0.123	0	0.9877
102	rs9886732	G	0.123, 0.123	0	0.9877

## Sheet: haplotypeblocks
Block/Haplotype	Freq.	Case, Control Ratio Counts	Case,Control Frequencies	Chi Square	P Value
Block 1
AGACTTACTT	0.315	51.3 : 94.7, 28.0 : 78.0	0.351, 0.264	2.163	0.1413
AGACTCGCTT	0.302	38.0 : 108.0, 38.0 : 68.0	0.260, 0.358	2.818	0.0932
GATTCTGGCA	0.154	23.8 : 122.2, 15.0 : 91.0	0.163, 0.142	0.225	0.6354
AGACTTGGCA	0.127	14.0 : 132.0, 18.0 : 88.0	0.096, 0.170	3.027	0.0819
AGACTTACCT	0.066	11.7 : 134.3, 5.0 : 101.0	0.080, 0.047	1.077	0.2994
AATTCTGGCA	0.013	3.2 : 142.8, 0.0 : 106.0	0.022, 0.000	2.316	0.1281
Block 2
AT	0.45	66.6 : 79.4, 46.9 : 59.1	0.456, 0.443	0.045	0.8328
CC	0.372	49.8 : 96.2, 43.9 : 62.1	0.341, 0.414	1.405	0.2358
AC	0.173	28.4 : 117.6, 15.1 : 90.9	0.195, 0.142	1.18	0.2774
Block 3
CTT	0.408	57.1 : 88.9, 45.8 : 60.2	0.391, 0.432	0.415	0.5195
TCC	0.379	60.8 : 85.2, 34.8 : 71.2	0.416, 0.328	2.026	0.1546
CTC	0.203	25.9 : 120.1, 25.2 : 80.8	0.177, 0.238	1.41	0.235
Block 4
GAGA	0.282	36.0 : 110.0, 35.0 : 71.0	0.247, 0.330	2.122	0.1452
AAAG	0.274	45.0 : 101.0, 24.0 : 82.0	0.308, 0.226	2.067	0.1505
GGGG	0.198	25.0 : 121.0, 25.0 : 81.0	0.171, 0.236	1.612	0.2042
GAAG	0.137	23.6 : 122.4, 11.0 : 95.0	0.161, 0.104	1.721	0.1896
GAGG	0.109	16.4 : 129.6, 11.0 : 95.0	0.113, 0.104	0.05	0.8239
Block 5
CT	0.504	77.0 : 69.0, 50.0 : 56.0	0.527, 0.472	0.762	0.3827
TC	0.429	56.0 : 90.0, 52.0 : 54.0	0.384, 0.491	2.871	0.0902
CC	0.067	13.0 : 133.0, 4.0 : 102.0	0.089, 0.038	2.57	0.1089
Block 6
ACTGAG	0.448	68.0 : 78.0, 45.0 : 61.0	0.466, 0.425	0.422	0.516
TCAGAT	0.201	27.0 : 119.0, 23.6 : 82.4	0.185, 0.223	0.556	0.4558
ATTAGG	0.187	24.0 : 122.0, 23.0 : 83.0	0.164, 0.217	1.12	0.29
ATTAAG	0.063	12.0 : 134.0, 4.0 : 102.0	0.082, 0.038	2.041	0.1531
ACAGAG	0.062	9.8 : 136.2, 5.7 : 100.3	0.067, 0.054	0.195	0.6589
TCAGAG	0.034	5.0 : 141.0, 3.5 : 102.5	0.034, 0.033	0.003	0.9555
Block 7
GCGC	0.349	48.0 : 98.0, 40.0 : 66.0	0.329, 0.377	0.636	0.4253
GTGT	0.343	53.7 : 92.3, 32.7 : 73.3	0.368, 0.309	0.949	0.3299
ATAT	0.15	25.9 : 120.1, 11.9 : 94.1	0.178, 0.113	2.033	0.154
ATGT	0.113	12.3 : 133.7, 16.2 : 89.8	0.084, 0.153	2.923	0.0873
GCGT	0.032	5.0 : 141.0, 3.0 : 103.0	0.034, 0.029	0.068	0.7947
Block 8
TA	0.405	58.1 : 87.9, 44.0 : 62.0	0.398, 0.415	0.074	0.7861
CA	0.317	44.9 : 101.1, 35.0 : 71.0	0.307, 0.330	0.148	0.7009
CG	0.278	43.0 : 103.0, 27.0 : 79.0	0.295, 0.255	0.485	0.4862
Block 9
CCG	0.334	44.8 : 101.2, 39.4 : 66.6	0.307, 0.372	1.15	0.2836
GCG	0.277	43.7 : 102.3, 26.0 : 80.0	0.299, 0.245	0.899	0.343
GCT	0.246	35.5 : 110.5, 26.6 : 79.4	0.243, 0.251	0.022	0.8816
GGT	0.143	22.0 : 124.0, 14.0 : 92.0	0.151, 0.132	0.174	0.6769
Block 10
AGT	0.635	89.9 : 56.1, 70.0 : 36.0	0.616, 0.660	0.521	0.4705
GTC	0.321	49.0 : 97.0, 32.0 : 74.0	0.336, 0.302	0.32	0.5714
ATT	0.04	6.1 : 139.9, 4.0 : 102.0	0.042, 0.038	0.023	0.8802
Block 11
TGGAA	0.52	75.0 : 71.0, 56.0 : 50.0	0.514, 0.528	0.052	0.8188
TTAGG	0.238	38.0 : 108.0, 22.0 : 84.0	0.260, 0.208	0.941	0.332
GTGAG	0.194	27.0 : 119.0, 22.0 : 84.0	0.185, 0.208	0.201	0.6543
TTGAG	0.036	4.0 : 142.0, 5.0 : 101.0	0.027, 0.047	0.697	0.4037
Block 12
AG	0.539	74.9 : 71.1, 60.9 : 45.1	0.513, 0.575	0.937	0.3331
GT	0.317	46.9 : 99.1, 32.9 : 73.1	0.321, 0.310	0.033	0.8557
GG	0.14	23.1 : 122.9, 12.1 : 93.9	0.158, 0.114	0.996	0.3184
Block 13
CCGC	0.793	115.0 : 31.0, 84.9 : 21.1	0.787, 0.801	0.072	0.7881
GTTT	0.189	28.9 : 117.1, 18.7 : 87.3	0.198, 0.176	0.188	0.6644
GCTT	0.014	2.1 : 143.9, 1.3 : 104.7	0.015, 0.013	0.018	0.8935
Block 14
AG	0.754	109.0 : 37.0, 81.0 : 25.0	0.747, 0.764	0.102	0.7491
TA	0.143	21.0 : 125.0, 15.0 : 91.0	0.144, 0.142	0.003	0.9585
TG	0.103	16.0 : 130.0, 10.0 : 96.0	0.110, 0.094	0.154	0.6944
Block 15
GCGTCG	0.528	73.0 : 73.0, 60.0 : 46.0	0.500, 0.566	1.075	0.2999
TTGTGA	0.202	30.9 : 115.1, 19.9 : 86.1	0.212, 0.188	0.222	0.6377
TTGTCG	0.111	19.0 : 127.0, 9.0 : 97.0	0.130, 0.085	1.272	0.2594
TTAGCG	0.079	14.0 : 132.0, 6.0 : 100.0	0.096, 0.057	1.297	0.2547
TCGTCG	0.06	8.0 : 138.0, 7.0 : 99.0	0.055, 0.066	0.139	0.7096
TTATCG	0.016	0.0 : 146.0, 4.0 : 102.0	0.000, 0.038	5.598	0.018
Block 16
GA	0.877	128.0 : 18.0, 93.0 : 13.0	0.877, 0.877	0	0.9877
AG	0.123	18.0 : 128.0, 13.0 : 93.0	0.123, 0.123	0	0.9877
Block 17
TGAGAC	0.472	64.0 : 82.0, 55.0 : 51.0	0.438, 0.519	1.597	0.2063
CGACAC	0.206	32.0 : 114.0, 20.0 : 86.0	0.219, 0.189	0.349	0.5548
CGGGAC	0.123	18.0 : 128.0, 13.0 : 93.0	0.123, 0.123	0	0.9877
CAGGTA	0.111	17.0 : 129.0, 11.0 : 95.0	0.116, 0.104	0.1	0.7521
CAGGTC	0.087	15.0 : 131.0, 7.0 : 99.0	0.103, 0.066	1.038	0.3082
