# Supplementary material for: Investigation of the Possible Role of Tie2 Pathway and TEK Gene in Asthma and Allergic Conjunctivitis
Source: Front Genet. 2020 Feb 27;11:128. doi: 10.3389/fgene.2020.00128 (PMC7057532; doi:10.3389/fgene.2020.00128)
Supplement: Supplementary Table 3 — Results of the statistical evaluation of the genotypic tests in the stage I study comparing patients with or without conjunctivitis. The models used in these tests are the followings: Recessive (R; 22 vs 12+11 genotypes, where 2 stands for the risk allele), dominant (D; 22+12 vs 11) and additive (A; 11 vs 12 vs 22). [file Table_3.xls]

## Sheet: Sheet1
SNP	Model	OR	CI	pValue
rs638203	R	7.8	1.80-33.77	0.006006
rs7034505	A	1.85	1.17-2.94	0.00857
rs7034505	D	2.28	1.18-4.43	0.01471
rs7873161	R	3	1.17-7.67	0.02178
rs6475966	R	2.97	1.17-7.55	0.0224
rs4601425	A	0.58	0.36-0.93	0.02312
rs622232	D	2.13	1.11-4.08	0.02351
rs12554723	R	0.33	0.12-0.91	0.03136
rs1590254	A	4.35	1.11-16.98	0.03446
rs1014049	D	2	1.05-3.82	0.03599
rs7873161	A	1.62	1.03-2.54	0.03734
rs3739542	R	3.02	1.06-8.56	0.03814
rs3739542	A	1.6	1.01-2.51	0.04352
rs4601425	R	0.44	0.19-0.99	0.04593
rs994934	A	1.86	1.01-3.41	0.04677
rs534129	A	1.56	1.00-2.43	0.05023
rs6475966	A	1.55	1.00-2.40	0.05029
rs10967731	A	1.65	0.99-2.74	0.05554
rs7034505	R	2.38	0.98-5.77	0.05564
rs7024846	A	1.53	0.99-2.36	0.05588
rs7862217	R	0.29	0.08-1.05	0.05951
rs17756667	R	0.19	0.03-1.09	0.06215
rs1014049	A	1.53	0.97-2.42	0.06719
rs7024846	D	1.84	0.94-3.58	0.07538
rs4601425	D	0.53	0.26-1.08	0.07883
rs534129	R	2.09	0.92-4.77	0.08011
rs12554723	A	0.65	0.40-1.05	0.08051
rs622232	A	1.52	0.95-2.44	0.08228
rs10757641	D	0.51	0.24-1.10	0.08419
rs10757641	A	0.58	0.31-1.09	0.08979
rs622232	D	1.72	0.92-3.23	0.08985
rs10967731	D	1.75	0.91-3.36	0.0908
rs10511804	A	0.66	0.41-1.07	0.09116
rs3739542	A	1.57	0.93-2.64	0.09126
rs7862217	R	0.42	0.15-1.16	0.09467
rs10511804	R	0.42	0.15-1.16	0.09467
rs581724	R	2.93	0.83-10.33	0.09493
rs2077317	A	1.89	0.89-3.99	0.0959
rs671804	A	1.78	0.89-3.56	0.1031
rs11789885	D	0.56	0.28-1.13	0.1038
rs17756667	A	0.63	0.36-1.10	0.1045
rs994934	A	1.53	0.91-2.55	0.1065
rs586441	D	2.01	0.86-4.70	0.1071
rs10511803	A	0.62	0.35-1.11	0.1085
rs622232	A	1.41	0.93-2.16	0.1086
rs7862217	A	0.68	0.42-1.09	0.1127
rs994934	D	1.72	0.88-3.39	0.1134
rs3739542	R	3.38	0.75-15.35	0.114
rs3736819	A	0.46	0.17-1.22	0.1188
rs586441	A	1.79	0.86-3.73	0.1188
rs7035021	D	0.6	0.31-1.15	0.1218
rs638203	R	1.95	0.84-4.57	0.1224
rs7855140	D	2.07	0.80-5.36	0.1323
rs7042267	D	1.68	0.85-3.30	0.1325
rs534129	D	1.61	0.85-3.05	0.1404
rs10511803	R	0.26	0.04-1.62	0.1495
rs10511804	R	0.43	0.13-1.37	0.1526
rs10967731	R	2.53	0.71-9.02	0.1526
rs3739542	D	1.55	0.85-2.81	0.1529
rs3736819	A	2.27	0.74-6.99	0.1537
rs534129	R	0.54	0.23-1.26	0.1539
rs3861015	A	0.62	0.33-1.20	0.1555
rs671804	D	1.71	0.81-3.58	0.1562
rs2077317	D	1.8	0.80-4.10	0.1579
rs7865623	A	0.36	0.09-1.50	0.1592
rs677534	A	1.59	0.83-3.04	0.1644
rs682632	D	4.35	0.54-34.87	0.1665
rs12554723	R	0.44	0.14-1.41	0.1676
rs7858722	A	0.74	0.47-1.14	0.1715
rs3861015	D	0.62	0.31-1.24	0.1719
rs7034505	D	1.57	0.82-2.99	0.172
rs3818282	D	1.52	0.83-2.78	0.1728
rs994934	D	1.52	0.83-2.79	0.1746
rs679026	R	4.68	0.48-45.97	0.1853
rs581724	D	0.62	0.30-1.26	0.1876
rs681182	R	4.63	0.47-45.39	0.1884
rs680739	R	4.63	0.47-45.39	0.1884
rs677534	R	4.63	0.47-45.39	0.1884
rs10738763	R	4.63	0.47-45.39	0.1884
rs671804	R	4.63	0.47-45.39	0.1884
rs10511803	D	0.64	0.32-1.26	0.1934
rs7024846	R	1.64	0.78-3.48	0.1944
rs4409485	R	2.35	0.64-8.64	0.1981
rs3824410	R	3.1	0.55-17.39	0.1982
rs2152065	D	1.49	0.81-2.72	0.1982
rs994934	R	2.61	0.60-11.29	0.1986
rs10967756	A	0.42	0.11-1.58	0.1991
rs590310	R	0.42	0.11-1.58	0.1998
rs7855140	A	1.73	0.75-4.01	0.2003
rs3739542	D	1.52	0.80-2.92	0.2043
rs651728	R	0.42	0.11-1.60	0.2051
rs7037246	D	1.5	0.80-2.80	0.2067
rs681182	A	1.51	0.79-2.86	0.2086
rs7037246	A	1.39	0.83-2.34	0.2102
rs10511804	D	0.66	0.35-1.26	0.2109
rs638203	R	1.56	0.78-3.15	0.2117
rs10967750	A	0.74	0.45-1.19	0.2141
rs7873161	D	1.54	0.78-3.04	0.2153
rs7855848	D	0.67	0.35-1.27	0.2172
rs7027647	A	1.41	0.82-2.45	0.2179
rs7858722	D	0.65	0.33-1.29	0.2182
rs7027647	D	1.45	0.80-2.65	0.2214
rs664461	A	0.74	0.46-1.20	0.2244
rs857	D	1.51	0.77-2.94	0.2263
rs7027984.1	A	1.4	0.81-2.42	0.2298
rs7027984.1	D	1.44	0.79-2.61	0.234
rs10967760	D	1.43	0.79-2.59	0.2387
rs7027984	A	1.39	0.80-2.41	0.2388
rs664461	R	0.64	0.30-1.35	0.2411
rs680739	A	1.47	0.77-2.78	0.2414
rs7027984	D	1.43	0.78-2.61	0.244
rs10812534	A	0.75	0.46-1.22	0.2468
rs677534	D	1.5	0.75-3.01	0.2527
rs679026	A	1.46	0.76-2.79	0.2529
rs10812541	A	1.6	0.71-3.60	0.2533
rs651345	A	0.74	0.44-1.24	0.2566
rs4242698	R	0.62	0.27-1.42	0.2576
rs4242698	A	0.77	0.50-1.21	0.2582
rs4409485	A	1.39	0.79-2.46	0.2589
rs10738763	A	1.44	0.76-2.70	0.2605
rs10967750	R	0.58	0.22-1.50	0.2606
rs4879250	R	1.73	0.67-4.49	0.2612
rs17756667	R	0.29	0.03-2.53	0.2616
rs1107774	R	0.6	0.24-1.47	0.2619
rs7862217	D	0.69	0.36-1.32	0.2636
rs17756667	D	0.68	0.35-1.33	0.2645
rs2152066	D	1.42	0.77-2.61	0.2664
rs489347	A	0.73	0.43-1.27	0.2674
rs3861015	A	0.69	0.36-1.33	0.271
rs574033	A	1.34	0.80-2.25	0.2723
rs669102	R	0.62	0.27-1.46	0.2732
rs6475966	R	1.48	0.74-2.96	0.2733
rs4409485	D	1.46	0.74-2.90	0.2758
rs651345	R	0.41	0.08-2.04	0.2779
rs633903	R	0.48	0.12-1.82	0.2785
rs10812534	R	0.48	0.12-1.82	0.2785
rs4242698	R	0.63	0.27-1.46	0.2796
rs7042267	R	0.66	0.32-1.40	0.2803
rs574033	D	1.41	0.75-2.65	0.282
rs6475966	D	1.43	0.74-2.76	0.2837
rs4878368	D	1.45	0.73-2.89	0.2865
rs10967795	A	1.33	0.79-2.22	0.2868
rs681707	A	1.32	0.79-2.23	0.2896
rs4878368	A	1.36	0.77-2.43	0.2914
rs857	A	1.34	0.78-2.33	0.2926
rs7858722	R	0.67	0.32-1.42	0.2951
rs7039849	A	1.33	0.78-2.25	0.2953
rs489347	D	0.7	0.36-1.37	0.2959
rs10967760	D	1.41	0.74-2.68	0.2959
rs12350649	A	1.43	0.73-2.78	0.2962
rs10967795	D	1.4	0.75-2.61	0.2964
rs7042267	D	1.44	0.73-2.85	0.2988
rs603085	D	1.55	0.68-3.52	0.2991
rs666478	R	1.55	0.68-3.52	0.2991
rs681707	D	1.39	0.74-2.62	0.3011
rs586441	D	1.44	0.72-2.89	0.304
rs603085	A	1.45	0.71-2.95	0.3056
rs682632	D	1.89	0.55-6.46	0.3079
rs10967760	R	0.49	0.13-1.92	0.3079
rs3737188	D	0.7	0.35-1.40	0.3115
rs7873161	R	1.44	0.71-2.90	0.3117
rs12554723	D	0.72	0.38-1.37	0.3131
rs1107774	R	0.62	0.24-1.58	0.3145
rs550982	A	1.31	0.78-2.20	0.3163
rs7039849	D	1.35	0.75-2.45	0.3183
rs4878368	R	1.99	0.52-7.67	0.3184
rs681182	D	1.42	0.71-2.81	0.3198
rs671804	A	1.33	0.75-2.36	0.3269
rs590310	A	0.78	0.48-1.28	0.3272
rs7858722	R	0.69	0.33-1.46	0.3315
rs7858722	A	0.79	0.50-1.27	0.3352
rs641848	R	2.14	0.45-10.13	0.3362
rs10812541	A	1.61	0.61-4.22	0.3367
rs7035021	A	0.79	0.48-1.28	0.3401
rs550982	D	1.36	0.72-2.56	0.3413
rs654422	A	0.7	0.33-1.47	0.3415
rs3737188	A	0.75	0.42-1.35	0.3441
rs3818282	A	1.26	0.78-2.02	0.347
rs10967750	D	0.73	0.38-1.41	0.3472
rs617333	A	1.46	0.66-3.26	0.35
rs10757641	R	2.75	0.33-23.02	0.3513
rs7865623	A	0.47	0.09-2.38	0.3582
rs651728	A	0.8	0.49-1.30	0.3596
rs12552228	R	3.09	0.27-34.68	0.3613
rs10757641	R	0.47	0.09-2.39	0.3618
rs3737188	A	1.29	0.74-2.24	0.3639
rs633903	A	0.8	0.49-1.30	0.3654
rs3861015	D	0.73	0.37-1.44	0.3664
rs2038569	R	3.04	0.27-34.18	0.3674
rs7855140	R	3.04	0.27-34.18	0.3674
rs7035592	D	1.34	0.71-2.56	0.3674
rs680739	D	1.37	0.69-2.72	0.3684
rs10511803	R	0.36	0.04-3.33	0.3712
rs2152065	A	1.24	0.77-2.00	0.374
rs2077317	R	2.27	0.37-13.96	0.3755
rs3737188	D	1.34	0.70-2.55	0.3762
rs7035592	A	1.26	0.75-2.11	0.3764
rs617986	R	0.61	0.21-1.82	0.3775
rs17761403	A	1.43	0.65-3.14	0.3783
rs638203	A	1.22	0.78-1.91	0.3798
rs857	D	1.4	0.66-3.00	0.3805
rs10812534	D	0.77	0.42-1.39	0.3806
rs682632	A	1.93	0.44-8.46	0.3809
rs12350649	D	1.36	0.68-2.72	0.3813
rs7855140	D	0.7	0.32-1.55	0.3815
rs857	R	0.51	0.11-2.35	0.3846
rs2038569	A	1.31	0.71-2.43	0.3848
rs679026	D	1.36	0.68-2.73	0.3865
rs4615675	A	1.39	0.66-2.96	0.3883
rs651345	D	0.77	0.42-1.40	0.3945
rs1334811	A	0.65	0.24-1.75	0.3962
rs10738763	D	1.34	0.68-2.64	0.3964
rs10967760	A	1.24	0.75-2.05	0.3989
rs622232	R	1.4	0.64-3.09	0.4001
rs11789885	A	0.82	0.53-1.29	0.4009
rs716676	D	0.74	0.37-1.49	0.4044
rs1334812	A	0.66	0.24-1.77	0.4054
rs2152066	A	1.21	0.77-1.91	0.4055
rs716676	R	0.39	0.04-3.58	0.406
rs716676	A	0.78	0.43-1.41	0.407
rs10967756	A	0.61	0.19-1.96	0.4075
rs1111782	R	1.62	0.51-5.14	0.4115
rs7034505	A	1.18	0.79-1.76	0.419
rs550190	D	1.32	0.67-2.61	0.4236
rs4242698	D	0.77	0.40-1.47	0.4242
rs590310	R	0.62	0.19-2.00	0.4244
rs630023	A	1.32	0.67-2.61	0.4246
rs664461	D	0.73	0.34-1.58	0.4272
rs550190	A	1.25	0.72-2.15	0.4278
rs4615675	D	1.36	0.63-2.95	0.4326
rs506685	D	0.79	0.43-1.45	0.4449
rs651728	R	0.63	0.20-2.04	0.4449
rs7862217	A	0.84	0.53-1.32	0.449
rs13285984	D	1.27	0.68-2.38	0.4541
rs7027984.1	A	1.26	0.69-2.29	0.4583
rs2273720	A	1.56	0.48-5.06	0.4598
rs666478	A	1.19	0.75-1.86	0.4615
rs654422	D	0.74	0.33-1.65	0.4669
rs586441	A	1.23	0.69-2.19	0.4735
rs3824410	D	0.8	0.43-1.48	0.4773
rs7027647	A	1.24	0.68-2.26	0.4918
rs682632	A	1.46	0.49-4.32	0.494
rs2038569	D	1.27	0.64-2.51	0.4946
rs1322051	A	0.71	0.26-1.91	0.4958
rs606342	R	1.28	0.63-2.60	0.4958
rs17761403	D	1.33	0.58-3.08	0.498
rs6475966	D	0.81	0.44-1.49	0.4984
rs10967750	A	0.85	0.54-1.35	0.4985
rs7855848	R	1.49	0.47-4.76	0.4997
rs4601425	R	0.75	0.33-1.73	0.501
rs606342	R	1.32	0.59-2.93	0.501
rs3824410	R	2.1	0.24-18.39	0.5039
rs7039849	R	2.1	0.24-18.39	0.5039
rs586441	R	2.09	0.24-18.34	0.5058
rs7873161	D	0.81	0.43-1.52	0.5103
rs669102	A	0.86	0.56-1.34	0.5118
rs12337434	R	1.53	0.43-5.48	0.5142
rs4615675	D	0.79	0.39-1.60	0.5153
rs7027984	A	1.22	0.67-2.23	0.5171
rs12337434	R	1.69	0.35-8.22	0.518
rs4409485	R	1.69	0.35-8.22	0.518
rs506685	A	0.86	0.53-1.37	0.5199
rs630023	D	1.26	0.62-2.57	0.5204
rs716676	D	0.8	0.41-1.57	0.5229
rs671804	D	1.23	0.65-2.34	0.5233
rs1111782	A	1.18	0.71-1.95	0.5238
rs3861015	R	0.41	0.02-6.62	0.5269
rs654422	R	0.41	0.02-6.62	0.5269
rs1107774	A	0.86	0.55-1.36	0.5274
rs7855848	A	0.86	0.53-1.38	0.5306
rs1107774	A	0.86	0.53-1.39	0.5322
rs671353	R	1.25	0.62-2.49	0.533
rs1014049	R	1.31	0.55-3.11	0.54
rs489347	R	0.68	0.19-2.36	0.5411
rs550190	R	0.64	0.15-2.78	0.5481
rs550982	R	1.54	0.37-6.38	0.5485
rs10967750	D	0.83	0.46-1.52	0.5559
rs633903	D	0.83	0.45-1.54	0.557
rs716676	A	0.83	0.45-1.53	0.5593
rs671353	R	1.26	0.58-2.73	0.5593
rs1014049	A	1.16	0.71-1.88	0.5611
rs574033	R	1.52	0.37-6.29	0.5619
rs7037246	R	1.52	0.37-6.29	0.5619
rs4242698	A	0.88	0.58-1.34	0.5621
rs13285984	D	0.81	0.40-1.64	0.563
rs550190	D	1.25	0.58-2.70	0.5653
rs1334811	D	0.72	0.24-2.20	0.5654
rs12350649	A	1.25	0.59-2.66	0.5667
rs681707	R	1.51	0.36-6.23	0.5709
rs4879250	D	0.83	0.44-1.59	0.5738
rs12552228	A	1.2	0.63-2.29	0.5744
rs1334812	D	0.73	0.24-2.22	0.5774
rs617986	R	0.74	0.26-2.12	0.5792
rs638203	A	1.12	0.74-1.69	0.58
rs10967795	R	1.49	0.36-6.17	0.58
rs2273719	D	0.83	0.43-1.60	0.583
rs10967795	R	0.66	0.15-2.89	0.5848
rs13285984	R	1.82	0.21-16.04	0.5888
rs617986	D	1.19	0.63-2.26	0.5899
rs7035021	R	1.37	0.43-4.42	0.5953
rs574033	R	0.67	0.15-2.92	0.5958
rs7037246	R	0.67	0.15-2.92	0.5958
rs590310	D	0.85	0.47-1.55	0.5967
rs7858722	D	0.82	0.39-1.74	0.6007
rs681707	R	0.68	0.16-2.94	0.6033
rs550982	R	0.68	0.16-2.94	0.6033
rs17756667	A	0.86	0.50-1.50	0.6043
rs11789885	R	1.26	0.52-3.02	0.6106
rs13285984	A	1.15	0.67-1.98	0.6124
rs10967760	A	1.15	0.67-2.00	0.6125
rs7039849	R	1.51	0.30-7.72	0.6175
rs2077317	A	1.16	0.64-2.10	0.6191
rs7855140	A	0.84	0.42-1.68	0.6195
rs617333	A	1.25	0.51-3.05	0.6195
rs10967750	R	0.78	0.30-2.07	0.6218
rs7035592	D	1.16	0.64-2.12	0.6238
rs12337434	A	1.14	0.67-1.96	0.6264
rs4878368	R	1.49	0.30-7.41	0.6278
rs12350649	D	1.21	0.56-2.64	0.6279
rs10511804	A	0.89	0.57-1.41	0.6285
rs1014049	R	1.27	0.47-3.40	0.634
rs10967731	R	1.25	0.49-3.19	0.6368
rs4601425	A	0.9	0.59-1.39	0.6378
rs534129	D	1.17	0.60-2.27	0.6416
rs1014049	D	1.17	0.60-2.27	0.6416
rs3818282	D	1.16	0.61-2.21	0.6431
rs617986	D	1.17	0.60-2.30	0.6439
rs664461	R	0.84	0.40-1.76	0.6443
rs651728	D	0.87	0.48-1.58	0.6457
rs716676	R	1.68	0.18-15.42	0.6471
rs3824410	A	1.15	0.64-2.06	0.6485
rs2273719	A	0.87	0.47-1.61	0.6486
rs10812534	A	0.89	0.53-1.49	0.6488
rs603085	R	1.66	0.18-15.25	0.6523
rs10121367	D	1.15	0.62-2.12	0.6542
rs3737188	R	1.45	0.28-7.39	0.6576
rs606342	D	0.85	0.41-1.74	0.6581
rs2273719	A	1.16	0.59-2.28	0.6601
rs630023	D	0.87	0.45-1.65	0.6633
rs13285984	R	0.68	0.12-3.84	0.666
rs654422	A	0.85	0.40-1.79	0.6676
rs7042267	R	0.85	0.40-1.81	0.6688
rs534129	A	0.9	0.56-1.45	0.6691
rs7027984.1	D	1.15	0.60-2.20	0.67
rs10967760	R	0.74	0.18-3.04	0.6716
rs586284	D	0.87	0.46-1.66	0.6717
rs514643	D	0.87	0.46-1.66	0.6717
rs4615675	A	0.86	0.44-1.70	0.6722
rs2152065	D	1.15	0.60-2.18	0.6738
rs7042267	A	1.1	0.70-1.72	0.6779
rs1334811	D	0.79	0.26-2.43	0.6813
rs7027984	R	1.51	0.21-11.00	0.6817
rs7027647	R	1.51	0.21-11.00	0.6817
rs857	A	1.14	0.61-2.11	0.683
rs7035592	R	1.28	0.39-4.16	0.6834
rs506685	D	0.87	0.44-1.70	0.6842
rs7027984.1	R	1.51	0.21-10.95	0.6852
rs2152066	D	1.14	0.60-2.19	0.6874
rs550190	R	1.34	0.32-5.55	0.688
rs669102	D	0.87	0.43-1.74	0.6899
rs10121367	A	1.12	0.65-1.93	0.6925
rs10812534	D	0.88	0.46-1.67	0.6933
rs12554723	D	1.13	0.62-2.05	0.6942
rs641848	D	1.13	0.62-2.06	0.6944
rs3818282	A	1.11	0.66-1.86	0.6961
rs4409485	A	1.1	0.67-1.81	0.6996
rs603085	D	0.87	0.42-1.79	0.7031
rs17761403	A	1.19	0.49-2.90	0.7044
rs681182	A	1.11	0.64-1.95	0.7049
rs586441	R	0.72	0.13-4.03	0.7068
rs1334812	D	0.81	0.26-2.48	0.7082
rs641848	A	1.1	0.67-1.79	0.7117
rs7027647	D	1.13	0.59-2.17	0.7132
rs1322051	D	0.81	0.26-2.52	0.7143
rs10121367	R	1.51	0.16-13.85	0.7164
rs2152065	A	1.1	0.66-1.85	0.7172
rs12552228	A	0.88	0.44-1.76	0.7221
rs12552228	D	0.87	0.40-1.89	0.7264
rs1111782	D	1.12	0.61-2.06	0.7267
rs3818282	R	0.82	0.26-2.54	0.7272
rs630023	A	0.9	0.49-1.66	0.7289
rs622232	R	1.17	0.48-2.82	0.7306
rs606342	D	0.89	0.46-1.71	0.7308
rs1111782	A	1.08	0.68-1.71	0.7355
rs7042267	A	1.07	0.71-1.63	0.7372
rs590310	A	0.91	0.54-1.54	0.7383
rs7855848	D	0.9	0.50-1.64	0.7396
rs10812534	R	0.81	0.23-2.81	0.74
rs12552228	D	1.13	0.55-2.34	0.7418
rs12554723	A	0.93	0.59-1.46	0.7424
rs586284	R	1.25	0.32-4.81	0.7455
rs514643	R	1.25	0.32-4.81	0.7455
rs633903	R	1.25	0.32-4.81	0.7455
rs1111782	D	1.11	0.58-2.15	0.7456
rs677534	A	1.1	0.63-1.92	0.7461
rs603085	A	0.9	0.49-1.66	0.7466
rs2152065	R	0.83	0.27-2.58	0.7466
rs489347	A	0.91	0.51-1.62	0.7469
rs13285984	A	0.91	0.49-1.66	0.7481
rs671353	D	0.9	0.46-1.74	0.7489
rs7027984	D	1.11	0.58-2.13	0.7498
rs4879250	A	1.07	0.69-1.67	0.753
rs10757641	D	0.88	0.40-1.94	0.7536
rs2273720	A	0.82	0.24-2.87	0.7593
rs1322051	A	1.18	0.41-3.38	0.7602
rs630023	R	1.54	0.09-25.00	0.7625
rs651345	R	0.8	0.19-3.34	0.7632
rs7855848	A	0.93	0.60-1.46	0.7635
rs4879250	A	0.93	0.58-1.50	0.7642
rs10812540	A	1.12	0.52-2.41	0.7644
rs581724	R	1.14	0.47-2.77	0.7696
rs654422	D	0.88	0.39-2.02	0.7704
rs12337434	D	1.1	0.58-2.09	0.7732
rs7035592	A	1.07	0.67-1.71	0.7743
rs2273719	R	1.5	0.09-24.37	0.7756
rs11789885	R	1.12	0.51-2.46	0.7763
rs506685	A	0.93	0.56-1.55	0.7785
rs489347	D	0.9	0.44-1.86	0.7815
rs4879250	D	0.92	0.51-1.67	0.7834
rs7035021	D	0.92	0.51-1.67	0.7835
rs11789885	A	1.06	0.70-1.61	0.7837
rs10738763	D	0.92	0.50-1.70	0.7841
rs2152066	A	1.07	0.66-1.75	0.7844
rs12337434	D	0.92	0.51-1.67	0.7867
rs3824410	D	1.1	0.56-2.13	0.7868
rs638203	D	0.92	0.48-1.74	0.7877
rs664461	A	0.94	0.61-1.46	0.7891
rs17761403	D	1.14	0.45-2.88	0.79
rs4879250	R	1.15	0.39-3.39	0.7937
rs2273719	D	1.1	0.54-2.22	0.7956
rs679026	A	1.08	0.61-1.90	0.7983
rs7024846	D	1.09	0.55-2.17	0.8067
rs10967798	A	0.74	0.07-8.35	0.8098
rs641848	D	0.93	0.48-1.77	0.8138
rs2077317	D	1.09	0.54-2.18	0.8153
rs3737188	R	0.81	0.14-4.60	0.816
rs550190	A	1.07	0.58-1.98	0.8178
rs489347	R	0.87	0.25-3.03	0.822
rs671353	A	1.05	0.67-1.65	0.8261
rs10967795	D	1.08	0.54-2.14	0.8289
rs10511804	D	1.07	0.59-1.94	0.8296
rs7035592	R	0.89	0.31-2.57	0.8307
rs651728	A	0.95	0.56-1.59	0.8312
rs680739	D	0.93	0.50-1.74	0.8319
rs4878368	A	1.06	0.63-1.76	0.8325
rs641848	A	1.06	0.62-1.80	0.8327
rs586284	A	0.95	0.57-1.58	0.8345
rs514643	A	0.95	0.57-1.58	0.8345
rs680739	A	1.06	0.61-1.86	0.8352
rs671353	D	0.93	0.45-1.91	0.8377
rs666478	D	1.08	0.53-2.16	0.839
rs4878368	D	0.94	0.50-1.75	0.8393
rs10967731	A	1.04	0.67-1.62	0.8444
rs550982	A	0.95	0.54-1.66	0.8457
rs7039849	A	1.06	0.60-1.87	0.8469
rs651345	D	1.06	0.56-2.03	0.8493
rs669102	R	1.09	0.45-2.65	0.8496
rs3824410	A	0.95	0.56-1.63	0.8525
rs11789885	D	1.06	0.57-1.97	0.8559
rs606342	A	1.04	0.68-1.58	0.8577
rs10511803	D	1.06	0.56-2.01	0.86
rs6475966	A	1.04	0.70-1.52	0.8608
rs669102	A	0.96	0.60-1.54	0.8627
rs671353	A	1.04	0.68-1.57	0.8641
rs10121367	A	1.05	0.57-1.93	0.8656
rs679026	D	0.95	0.50-1.78	0.8657
rs7035021	A	0.96	0.61-1.52	0.8657
rs4601425	D	0.95	0.51-1.76	0.8682
rs1107774	D	0.95	0.51-1.76	0.8682
rs633903	D	0.95	0.49-1.83	0.8686
rs10812540	A	0.93	0.41-2.12	0.8688
rs7037246	D	1.06	0.53-2.10	0.8697
rs2038569	R	0.82	0.07-9.23	0.8716
rs7855140	R	0.82	0.07-9.23	0.8716
rs7873161	A	1.03	0.69-1.54	0.8749
rs7862217	D	1.05	0.58-1.90	0.8764
rs1111782	R	1.08	0.41-2.83	0.8764
rs12552228	R	0.83	0.07-9.30	0.8766
rs857	R	1.12	0.24-5.20	0.8801
rs17756667	D	0.95	0.51-1.79	0.8811
rs10738763	A	1.04	0.60-1.82	0.8818
rs4409485	D	0.95	0.51-1.77	0.8818
rs574033	A	0.96	0.55-1.68	0.8879
rs7024846	A	1.03	0.65-1.64	0.8889
rs651728	D	1.05	0.55-1.99	0.8924
rs10511803	A	0.96	0.55-1.69	0.8934
rs10757641	A	1.04	0.56-1.96	0.8936
rs506685	R	0.93	0.32-2.75	0.9004
rs581724	D	0.96	0.51-1.80	0.9051
rs586284	R	1.07	0.33-3.51	0.9094
rs514643	R	1.07	0.33-3.51	0.9094
rs641848	R	1.07	0.33-3.51	0.9094
rs7034505	R	0.96	0.47-1.96	0.9106
rs606342	A	1.03	0.65-1.61	0.9109
rs7855848	R	0.94	0.35-2.56	0.9114
rs681707	A	0.97	0.55-1.70	0.9126
rs681707	D	1.03	0.52-2.05	0.9233
rs7035021	R	1.05	0.38-2.90	0.9249
rs617986	A	1.02	0.61-1.74	0.9275
rs586284	D	0.97	0.53-1.77	0.9304
rs514643	D	0.97	0.53-1.77	0.9304
rs669102	D	0.97	0.52-1.83	0.9307
rs666478	D	1.03	0.54-1.98	0.9315
rs677534	D	0.97	0.52-1.82	0.9318
rs581724	A	0.98	0.60-1.61	0.9396
rs1107774	D	0.97	0.50-1.90	0.9405
rs506685	R	1.05	0.32-3.46	0.9407
rs9987817	A	1.03	0.49-2.16	0.9467
rs10121367	D	1.02	0.52-2.01	0.9478
rs574033	D	1.02	0.52-2.03	0.9496
rs581724	A	1.01	0.64-1.60	0.9498
rs2152065	R	1.04	0.31-3.47	0.9515
rs1334811	A	0.97	0.37-2.58	0.9536
rs2152066	R	0.97	0.35-2.68	0.9539
rs7037246	A	0.98	0.56-1.73	0.9546
rs9987817	A	0.98	0.49-1.95	0.9583
rs651345	A	1.01	0.59-1.75	0.9604
rs3818282	R	1.03	0.31-3.44	0.9624
rs666478	A	1.01	0.67-1.53	0.9637
rs7024846	R	0.98	0.43-2.23	0.967
rs2038569	D	1.02	0.48-2.13	0.9685
rs9886732	A	1.02	0.48-2.13	0.9685
rs638203	D	0.99	0.49-1.98	0.9703
rs4242698	D	0.99	0.54-1.80	0.9718
rs10967731	D	0.99	0.55-1.79	0.9761
rs7039849	D	0.99	0.52-1.88	0.9785
rs12337434	A	1.01	0.61-1.65	0.9801
rs1334812	A	0.99	0.37-2.62	0.9803
rs586284	A	0.99	0.62-1.61	0.9807
rs514643	A	0.99	0.62-1.61	0.9807
rs681182	D	0.99	0.53-1.84	0.982
rs10121367	R	0.98	0.16-6.02	0.9829
rs10967795	A	0.99	0.57-1.75	0.9847
rs994934	R	6.97077e+06	0.00-Inf	0.9852
rs7029731	A	0	0.00-Inf	0.986
rs682632	R	0	0.00-Inf	0.986
rs10967798	A	2.42194e+06	0.00-Inf	0.986
rs664461	D	1.01	0.51-2.00	0.9862
rs9886732	A	0.99	0.50-1.98	0.9862
rs4615675	R	3.26805e+06	0.00-Inf	0.9864
rs17761403	R	3.20669e+06	0.00-Inf	0.9865
rs7871282	A	3.19356e+06	0.00-Inf	0.9865
rs12350649	R	3.11843e+06	0.00-Inf	0.9865
rs7029731	A	0	0.00-Inf	0.9872
rs666478	R	0.99	0.49-2.03	0.9872
rs682632	R	0	0.00-Inf	0.9872
rs17761403	R	877059	0.00-Inf	0.9876
rs4615675	R	874170	0.00-Inf	0.9876
rs7871282	A	858228	0.00-Inf	0.9877
rs12350649	R	850608	0.00-Inf	0.9877
rs3861015	R	0	0.00-Inf	0.9882
rs654422	R	0	0.00-Inf	0.9882
rs1322051	R	0	0.00-Inf	0.9882
rs1334811	R	0	0.00-Inf	0.9882
rs1334812	R	0	0.00-Inf	0.9882
rs10116212	A	0	0.00-Inf	0.9883
rs2077317	R	6.83925e+06	0.00-Inf	0.9883
rs630023	R	2.33168e+06	0.00-Inf	0.9886
rs10116212	A	2.46763e+06	0.00-Inf	0.9886
rs1322051	R	2.35753e+06	0.00-Inf	0.9886
rs1334811	R	2.35753e+06	0.00-Inf	0.9886
rs1334812	R	2.40287e+06	0.00-Inf	0.9886
rs2273719	R	2.40287e+06	0.00-Inf	0.9886
rs1590254	A	1.91091e+07	0.00-Inf	0.9888
rs1322051	D	1.01	0.30-3.37	0.9892
rs7027984	R	6.74408e+06	0.00-Inf	0.9895
rs681182	R	6.63618e+06	0.00-Inf	0.9896
rs680739	R	6.63618e+06	0.00-Inf	0.9896
rs677534	R	6.63618e+06	0.00-Inf	0.9896
rs10738763	R	6.63618e+06	0.00-Inf	0.9896
rs679026	R	6.5762e+06	0.00-Inf	0.9896
rs671804	R	6.63618e+06	0.00-Inf	0.9896
rs7027984.1	R	6.63618e+06	0.00-Inf	0.9896
rs7027647	R	6.56347e+06	0.00-Inf	0.9896
rs617986	A	1	0.61-1.63	0.9922
rs2038569	A	1	0.51-1.95	0.994
rs550982	D	1	0.50-1.98	0.9954
rs590310	D	1	0.52-1.92	0.9956
rs603085	R	1	0.16-6.11	0.9959
rs633903	A	1	0.59-1.68	0.9988
rs2152066	R	1	0.39-2.58	1
