# Supplementary material for: Investigation of the Possible Role of Tie2 Pathway and TEK Gene in Asthma and Allergic Conjunctivitis
Source: Front Genet. 2020 Feb 27;11:128. doi: 10.3389/fgene.2020.00128 (PMC7057532; doi:10.3389/fgene.2020.00128)
Supplement: Supplementary Table 5 — Results of the genotyping and the statistical evaluations of the comparisons of allelic frequencies in the stage II study comparing patients with or without asthma (sheet: ‘Asthma’) and conjunctivitis (sheet: ‘Conjunctivitis’). [file Table_5.xlsx]

## Sheet: Asthma
Phenotype		SNP	Phenotype	MAF	Genotype11	Genotype12	Genotype22	Differences between allelic frequencies
					n(%)	n(%)	n(%)	p		OR(95% CI)
Pediatric asthma		rs7034505	Present	0.47	56 (26)	114 (54)	42 (20)	0.51		0.93 (0.74-1.16)
			Absent	0.49	132 (27)	247 (50)	118 (23)
		rs3739542	Present	0.3	120 (51)	92 (39)	24 (10)	0.44		0.91 (0.72-1.16)
			Absent	0.32	235 (46)	226 (45)	48 (9)
		rs994934	Present	0.23	132 (58)	86 (38)	9 (4)	0.91		1.02 (0.78-1.32)
			Absent	0.23	294 (59)	181 (36)	22 (5)
		rs622232	Present	0.46	58 (32)	80 (44)	43 (24)	0.56		0.93 (0.73-1.19)
			Absent	0.48	119 (26)	250 (54)	97 (20)
		rs638203	Present	0.5	58 (26)	111 (49)	56 (25)	0.41		1.10 (0.88-1.37)
			Absent	0.47	140 (28)	256 (50)	112 (22)
		rs3824410	Present	0.21	152 (64)	71 (30)	14 (6)	0.42		1.12 (0.85-1.47)
			Absent	0.19	317 (66)	141 (29)	21 (5)
Adult asthma		rs7034505	Present	0.49	52 (24)	119 (55)	47 (21)	0.93		1.01 (0.77-1.32)
			Absent	0.49	52 (25)	112 (53)	46 (22)
		rs3739542	Present	0.28	120 (52)	92 (40)	18 (8)	0.75		1.05 (0.78-1.41)
			Absent	0.27	112 (52)	89 (42)	13 (6)
		rs994934	Present	0.23	136 (61)	70 (32)	16 (7)	0.19		1.25 (0.89-1.75)
			Absent	0.19	123 (64)	64 (33)	5 (3)
		rs622232	Present	0.46	57 (26)	123 (56)	38 (18)	0.37		1.14 (0.86-1.05)
			Absent	0.43	58 (30)	107 (55)	29 (15)
		rs638203	Present	0.45	47 (21)	112 (49)	70 (30)	0.23		1.18 (0.90-1.54)
			Absent	0.49	55 (26)	95 (45)	59 (29)
		rs3824410	Present	0.2	147 (66)	71 (31)	9 (3)	0.22		1.26 (0.87-1.83)
			Absent	0.16	116 (69)	48 (29)	3 (2)

## Sheet: Conjunctivitis
Phenotype		SNP	Phenotype	MAF	Genotype11	Genotype12	Genotype22	Differences between allelis frequencies
					n(%)	n(%)	n(%)	p		OR(95% CI)
Allergic conjunctivitis		rs7034505	Present	0.44	21 (31)	34 (50)	13 (19)	0.337		0.84 (0.59-1.20)
			Absent	0.48	167 (26)	327 (51)	147 (23)
		rs3739542	Present	0.31	43 (49)	35 (40)	10 (11)	0.941		1.01 (0.56-1.44)
			Absent	0.31	312 (47)	283 (43)	62 (10)
		rs994934	Present	0.25	41 (56)	27 (37)	5 (7)	0.425		1.17 (0.80-1.74)
			Absent	0.22	385 (59)	240 (37)	26 (4)
		rs622232	Present	0.54	12 (21)	29 (50)	17 (29)	0.105		1.37 (0.94-2.01)
			Absent	0.46	165 (28)	301 (51)	123 (21)
		rs638203	Present	0.46	23 (31)	35 (47)	17 (22)	0.613		0.92 (0.65-1.29)
			Absent	0.48	175 (27)	332 (50)	151 (23)
		rs3824410	Present	0.22	51 (60)	31 (36)	3 (4)	0.469		1.16 (0.78-1.71)
			Absent	0.19	418 (66)	181 (29)	32 (5)
