# Supplementary material for: Investigation of the Possible Role of Tie2 Pathway and TEK Gene in Asthma and Allergic Conjunctivitis
Source: Front Genet. 2020 Feb 27;11:128. doi: 10.3389/fgene.2020.00128 (PMC7057532; doi:10.3389/fgene.2020.00128)
Supplement: Supplementary Table 6 — The log2 fold change (logFC) values of the gene expressions of the ten selected genes in the lungs of mice at three time points (group1, 2 and 3, see text) leading to Th2-type allergic airway inflammation relative to controls and the statistical evaluations. The significant adjusted p-values are highlighted. The threshold of significance: p < 0.05. [file Table_6.xlsx]

## Sheet: Munka1
Gene.ID	Human.Gene.ID	t	P.Value	logFC	CI.L	CI.R	adj.P.Val	GEOID	Group	Method	B	Human.Gene.symbol
18033	4790	45.9255	2.27284e-05	0.17725	0.164967	0.189533	0.0200688	GSE11911	1	adj.P.Val	NA	NFKB1
16542	3791	1	0.391002	0.017775	-0.038793	0.074343	0.48862	GSE11911	1	adj.P.Val	NA	KDR
18706	5290	-1.96596	0.144013	-0.0323075	-0.0846061	0.0199911	0.245533	GSE11911	1	adj.P.Val	NA	PIK3CA
11600	284	-16.6003	0.000475855	-0.30075	-0.358407	-0.243093	0.0322562	GSE11911	1	adj.P.Val	NA	ANGPT1
11651	207	2.60135	0.0802824	0.034805	-0.0077749	0.0773849	0.167901	GSE11911	1	adj.P.Val	NA	AKT1
18127	4846	2.25309	0.109624	0.061975	-0.0255635	0.149514	0.204722	GSE11911	1	adj.P.Val	NA	NOS3
19263	5787	-5.95408	0.00947529	-0.17775	-0.272757	-0.082743	0.0578253	GSE11911	1	adj.P.Val	NA	PTPRB
21687	7010	-0.864049	0.451116	-0.023385	-0.109516	0.0627461	0.546839	GSE11911	1	adj.P.Val	NA	TEK
11602	51378	-2.36013	0.0993882	-0.355075	-0.833865	0.123715	0.191889	GSE11911	1	adj.P.Val	NA	ANGPT4
11601	285	-4.3642	0.0222436	-0.175725	-0.303866	-0.0475836	0.0808764	GSE11911	1	adj.P.Val	NA	ANGPT2
18033	4790	21.9014	0.000208356	0.12625	0.107905	0.144595	0.00457456	GSE11911	2	adj.P.Val	NA	NFKB1
16542	3791	1.41869	0.251034	0.1125	-0.139863	0.364863	0.310027	GSE11911	2	adj.P.Val	NA	KDR
18706	5290	-27.6473	0.000103866	-0.084225	-0.09392	-0.07453	0.00414659	GSE11911	2	adj.P.Val	NA	PIK3CA
11600	284	-10.8399	0.00167975	-0.37575	-0.486065	-0.265435	0.00851431	GSE11911	2	adj.P.Val	NA	ANGPT1
11651	207	9.80335	0.00225587	0.052775	0.0356427	0.0699073	0.0096449	GSE11911	2	adj.P.Val	NA	AKT1
18127	4846	-0.825998	0.469365	-0.023875	-0.115862	0.0681118	0.520578	GSE11911	2	adj.P.Val	NA	NOS3
19263	5787	-18.8707	0.000324888	-0.41375	-0.483527	-0.343973	0.00499572	GSE11911	2	adj.P.Val	NA	PTPRB
21687	7010	-21.2906	0.00022671	-0.2585	-0.29714	-0.21986	0.0046307	GSE11911	2	adj.P.Val	NA	TEK
11602	51378	-4.46237	0.0209578	-0.396	-0.678417	-0.113583	0.040605	GSE11911	2	adj.P.Val	NA	ANGPT4
11601	285	-11.0506	0.00158727	-0.128	-0.164862	-0.0911376	0.00837402	GSE11911	2	adj.P.Val	NA	ANGPT2
18033	4790	7.83202	0.00433442	0.09875	0.0586241	0.138876	0.0322513	GSE11911	3	adj.P.Val	NA	NFKB1
16542	3791	2.26876	0.108048	0.19075	-0.0768197	0.45832	0.171927	GSE11911	3	adj.P.Val	NA	KDR
18706	5290	-4.1901	0.0247865	-0.083275	-0.146524	-0.0200263	0.0641601	GSE11911	3	adj.P.Val	NA	PIK3CA
11600	284	-5.47558	0.0119769	-0.365	-0.577141	-0.152859	0.0454471	GSE11911	3	adj.P.Val	NA	ANGPT1
11651	207	8.46923	0.0034559	0.03155	0.0196946	0.0434054	0.0304933	GSE11911	3	adj.P.Val	NA	AKT1
18127	4846	-1.68337	0.190892	-0.033925	-0.0980608	0.0302108	0.267752	GSE11911	3	adj.P.Val	NA	NOS3
19263	5787	-6.26508	0.0082078	-0.33075	-0.49876	-0.16274	0.039282	GSE11911	3	adj.P.Val	NA	PTPRB
21687	7010	-4.30646	0.0230479	-0.179125	-0.311497	-0.0467529	0.0618415	GSE11911	3	adj.P.Val	NA	TEK
11602	51378	-4.95447	0.015783	-0.29725	-0.488185	-0.106315	0.0510731	GSE11911	3	adj.P.Val	NA	ANGPT4
11601	285	-4.88165	0.0164348	-0.142975	-0.236183	-0.0497668	0.0520003	GSE11911	3	adj.P.Val	NA	ANGPT2
Additional measurements:
67753	54586	NA	NA	0	NA	NA	NA	GSE11911	1	adj.P.Val		Eqtn
214944	79817	5,151820051	0,01417779063	0,12705	0,0485670951	0,2055329049	0,06634483682	GSE11911	1	adj.P.Val		Mob3b
67753	54586	-1	0,391002219	-0,0285	-0,1191997197	0,0621997197	0,4439495013	GSE11911	2	adj.P.Val		Eqtn
214944	79817	2,764561321	0,06988526358	0,0811075	-0,0122600306	0,1744750306	0,1068747465	GSE11911	2	adj.P.Val		Mob3b
67753	54586	NA	NA	0	NA	NA	NA	GSE11911	3	adj.P.Val		Eqtn
214944	79817	7,81000307	0,004369794994	0,12265	0,0726721657	0,1726278343	0,03230940377	GSE11911	3	adj.P.Val		Mob3b
